# Supplementary material for: Drug levels of VEDOLIZUMAB in patients with pediatric-onset inflammatory bowel disease in a real-life setting
Source: Springer Nature journal article supplement (doi:10.1007/s00431-023-05255-y), 2023-10-25
Supplement: MOESM2 [file 26221624]

| Number of patients per month  |    |    |    |    |    |    |    |    |    |    |    |    |    |    |    |
|-------------------------------|----|----|----|----|----|----|----|----|----|----|----|----|----|----|----|
| Months                        | 0  | 1  | 2  | 3  | 6  | 9  | 12 | 15 | 18 | 21 | 24 | 30 | 36 | 42 | 48 |
| VDZ standard protocol N=29    | 29 | 29 | 27 | 26 | 21 | 18 | 15 | 15 | 14 | 12 | 10 | 6  | 2  | 2  | 1  |
| VDZ enhancement protocol N=21 | 21 | 21 | 21 | 21 | 19 | 14 | 11 | 9  | 7  | 6  | 6  | 2  | 2  | 1  | 0  |
