# Supplementary material for: Drug levels of VEDOLIZUMAB in patients with pediatric-onset inflammatory bowel disease in a real-life setting
Source: Springer Nature journal article supplement (doi:10.1007/s00431-023-05255-y), 2023-10-25
Supplement: MOESM3 [file 26221624]

Additional Table 2. Characteristics of the pediatric patients with standard VDZ protocol and enhancement protocol

|                                         |                                                                                             | Standard protocol<br>(N=29)          | Enhancement protocol<br>(N=21)       |
|-----------------------------------------|---------------------------------------------------------------------------------------------|--------------------------------------|--------------------------------------|
| Age at diagnosis, years, median (range) |                                                                                             | 11.0<br>(3.2-16.1)                   | 12.4<br>(3.8-15.5)                   |
| Age at start of VDZ, median (range)     |                                                                                             | 15.1<br>(7.6-19.1)                   | 14.8<br>(4.6-15.6)                   |
| Disease duration, years, median (range) |                                                                                             | 4<br>(0.4-12.6)                      | 2.3<br>(0.3-10.6)                    |
| Disease type                            | Crohn's disease N (%)<br>Ulcerative colitis N (%)<br>IBD-U N (%)                            | 9 (31)<br>8 (28)<br>12 (41)          | 5 (24)<br>9 (43)<br>7 (33)           |
| Location CD, n (%)                      | L1 distal 1/3 ileum ± cecal disease<br>L2 colitis<br>L3 ileocolitis<br>L3+L4a upper disease | 0<br>1 (11)<br>5 (56)<br>3 (33)      | 0<br>2 (40)<br>1 (20)<br>2 (40)      |
| Behaviour CD, n (%)                     | B1 non structuring, non penetrating<br>B2 stricturing<br>B3 penetrating                     | 7 (78)<br>1 (11)<br>1 (11)           | 3 (60)<br>1 (20)<br>1 (20)           |
| Perianal disease n (%)                  |                                                                                             | 1 (11)                               | 2 (40)                               |
| Location UC/IBD-U n (%)                 | E1 proctitis<br>E2 left-sided<br>E3 extensive<br>E4 pancolitis                              | 1 (5)<br>4 (20)<br>3 (15)<br>12 (60) | 0 (0)<br>3 (19)<br>3 (19)<br>10 (62) |
| Severity n (%)                          | S1 ever severe                                                                              | 20 (100)                             | 16 (100)                             |
| Growth delay n (%)                      |                                                                                             | 9 (31)                               | 6 (29)                               |
| Surgery n (%)                           |                                                                                             | 2 (7)                                | 1 (5)                                |
| Prior biologic medication n (%)         | Biologic-naïve<br>TNF-α naïve<br>Exposure for ustekinumab                                   | 9 (31)<br>9 (31)<br>2 (7)            | 3 (14)<br>4 (19)<br>3 (14)           |

|                                               |                |                   |                   |
|-----------------------------------------------|----------------|-------------------|-------------------|
| Medication at vedolizumab induction n (%)     | TNF-blocker    | 20 (69)           | 21 (100)          |
|                                               | Azathioprine   | 3 (10)            | 3 (14)            |
|                                               | Methotrexate   | 3 (10)            | 0 (0)             |
|                                               | 5-ASA          | 17 (59)           | 10 (48)           |
|                                               | Corticosteroid | 24 (83)           | 18 (86)           |
| Fecal calprotectin at vedolizumab induction   |                |                   |                   |
| median $\mu\text{g/g}$ (25-75% interquartile) |                | 781<br>(492-1721) | 684<br>(130-1251) |
| < 100 $\mu\text{g/g}$                         |                | 3 (10)            | 1 (5)             |
| >1000 $\mu\text{g/g}$                         |                | 9 (31)            | 7 (33)            |
