# Supplementary material for: Drug levels of VEDOLIZUMAB in patients with pediatric-onset inflammatory bowel disease in a real-life setting
Source: Springer Nature journal article supplement (doi:10.1007/s00431-023-05255-y), 2023-10-25
Supplement: MOESM4 [file 26221624]

| Months                  | Crohn                                  |                    |                                                 | UC                                     |
|-------------------------|----------------------------------------|--------------------|-------------------------------------------------|----------------------------------------|
|                         | Number of patients with corticosteroid | Number of patients | % of patients on corticosteroid of all patients | Number of patients with corticosteroid |
| <b>Beginning of VDZ</b> | 11                                     | 14                 | 0,785714286                                     | 14                                     |
| <b>1.5 months</b>       | 11                                     | 14                 | 0,785714286                                     | 12                                     |
| <b>3 months</b>         | 8                                      | 13                 | 0,615384615                                     | 8                                      |
| <b>6 months</b>         | 5                                      | 12                 | 0,416666667                                     | 7                                      |
| <b>12 months</b>        | 2                                      | 8                  | 0,25                                            | 3                                      |

| Number of patients | % of patients on corticosteroid of all patients | IBDU                                   |                    |                                                 |
|--------------------|-------------------------------------------------|----------------------------------------|--------------------|-------------------------------------------------|
|                    |                                                 | Number of patients with corticosteroid | Number of patients | % of patients on corticosteroid of all patients |
| 17                 | 0,823529412                                     | 17                                     | 19                 | 0,894736842                                     |
| 17                 | 0,705882353                                     | 14                                     | 19                 | 0,736842105                                     |
| 16                 | 0,5                                             | 7                                      | 17                 | 0,411764706                                     |
| 15                 | 0,466666667                                     | 5                                      | 15                 | 0,333333333                                     |
| 10                 | 0,3                                             | 2                                      | 9                  | 0,222222222                                     |
